# Supplementary material for: Exploiting the Mutanome for Tumor Vaccination
Source: Oxford University Press journal article supplement (doi:10.1158/0008-5472.can-11-3722), 2012-01-12
Supplement: 00085472can113722-sup-stab_1_xls_15k.xlsx [file 00085472can113722-sup-stab_1_xls_15k.xlsx]

## Sheet: Tabelle1
A
Exome-Seq	B16F10	B16F10	B16F10	C57BL/6	C57BL/6	C57BL/6
	Extraction #1	Extraction #2	Extraction #3	Mouse #1	Mouse #2	Mouse #3
#reads	104671967	104947958	104301110	100510821	104263002	104313375
aligned uniquely	83367584	83693041	83520920	80497491	83433703	83907053
% aligned uniquely	0.796	0.797	0.801	0.801	0.8	0.804
aligned on target	40707291	41007510	41146982	39012052	40301215	40527832
% on target	0.488	0.49	0.493	0.485	0.483	0.483
B
RNA-Seq	B16F10	B16F10	B16F10
	Extraction #1	Extraction #2	Extraction #3
#reads	29761551	30778933	17241256
aligned to genome	21064967	23926281	13601673
aligned to junctions	2835421	3233624	1790749
total	23900388	27159905	15392422
total %	0.8	0.88	0.89
