# Supplementary material for: Exploiting the Mutanome for Tumor Vaccination
Source: Oxford University Press journal article supplement (doi:10.1158/0008-5472.can-11-3722), 2012-01-12
Supplement: 00085472can113722-sup-tab_2_xls_56k.xlsx [file 00085472can113722-sup-tab_2_xls_56k.xlsx]

## Sheet: Data
MUT	Symbol	Entrez Gene Name	Subcellular localization	Type(s)
1	Fzd7	frizzled family receptor 7	Plasma Membrane	G-protein coupled receptor
2	Xpot	exportin, tRNA (nuclear export receptor for tRNAs)	Nucleus	other
3	Ranbp2	RAN binding protein 2	Nucleus	enzyme
5	Eef2	eukaryotic translation elongation factor 2	Cytoplasm	translation regulator
6	Ptrf	polymerase I and transcript release factor	Nucleus	transcription regulator
7	Trp53	tumor protein p53	Nucleus	transcription regulator
8	Ddx23	DEAD (Asp-Glu-Ala-Asp) box polypeptide 23	Nucleus	enzyme
9	Golgb1	golgin B1	Cytoplasm	other
10	Pcdhga11	protocadherin gamma subfamily A, 11	Plasma Membrane	other
11	Snx15	sorting nexin 15	Cytoplasm	transporter
12	Gnas	GNAS (guanine nucleotide binding protein, alpha stimulating) complex locus	Plasma Membrane	enzyme
13	Fndc3b	fibronectin type III domain containing 3B	Cytoplasm	other
14	Sbno1	strawberry notch homolog 1 (Drosophila)	unknown	enzyme
16	Thumpd3	THUMP domain containing 3	unknown	other
17	Tnpo3	transportin 3	Cytoplasm	other
18	Numa1	nuclear mitotic apparatus protein 1	Nucleus	other
19	Wwp2	WW domain containing E3 ubiquitin protein ligase 2	Cytoplasm	enzyme
20	Tubb3	tubulin, beta 3	Cytoplasm	other
21	Atp11a	ATPase, class VI, type 11A	Plasma Membrane	transporter
22	Asf1b	ASF1 anti-silencing function 1 homolog B (S. cerevisiae)	Nucleus	other
24	Dag1	dystroglycan 1 (dystrophin-associated glycoprotein 1)	Plasma Membrane	transmembrane receptor
25	Plod2	procollagen-lysine, 2-oxoglutarate 5-dioxygenase 2	Cytoplasm	enzyme
26	Orc2	origin recognition complex, subunit 2	Nucleus	other
28	Ppp1r7	protein phosphatase 1, regulatory (inhibitor) subunit 7	Nucleus	phosphatase
29	Mthfd1l	methylenetetrahydrofolate dehydrogenase (NADP+ dependent) 1-like	Cytoplasm	enzyme
30	Kif18b	kinesin family member 18B	unknown	other
32	Itsn2	intersectin 2	Cytoplasm	other
33	Pbk	PDZ binding kinase	Cytoplasm	kinase
34	Klhl22	kelch-like 22 (Drosophila)	unknown	other
35	Ddb1	damage-specific DNA binding protein 1, 127kDa	Nucleus	other
36	Tm9sf3	transmembrane 9 superfamily member 3	Cytoplasm	transporter
37	Dpf2	D4, zinc and double PHD fingers family 2	Nucleus	other
38	Atrn	attractin	Extracellular Space	other
39	Snx5	sorting nexin 5	Cytoplasm	transporter
40	Armc1	armadillo repeat containing 1	Cytoplasm	other
41	Ash1l	ash1 (absent, small, or homeotic)-like (Drosophila)	Nucleus	transcription regulator
42	S100a13	S100 calcium binding protein A13	Cytoplasm	other
43	2510039O18Rik	KIAA2013	unknown	other
46	Actn4	actinin, alpha 4	Cytoplasm	other
47	Rpl13a	ribosomal protein L13a	Cytoplasm	other
50	Sema3b	sema domain, immunoglobulin domain (Ig), short basic domain, secreted, (semaphorin) 3B	Extracellular Space	other
	Clasp1	cytoplasmic linker associated protein 1	Cytoplasm	other
	Nckap5	NCK-associated protein 5	unknown	other
	Rab3gap1	RAB3 GTPase activating protein subunit 1 (catalytic)	Cytoplasm	other
	Mcm6	minichromosome maintenance complex component 6	Nucleus	enzyme
	Dyrk3	dual-specificity tyrosine-(Y)-phosphorylation regulated kinase 3	Nucleus	kinase
	Pik3c2b	phosphoinositide-3-kinase, class 2, beta polypeptide	Cytoplasm	kinase
	Nav1	neuron navigator 1	Cytoplasm	enzyme
	Camsap1l1	calmodulin regulated spectrin-associated protein 1-like 1	unknown	other
	Serpinc1	serpin peptidase inhibitor, clade C (antithrombin), member 1	Extracellular Space	other
	Rab3gap2	RAB3 GTPase activating protein subunit 2 (non-catalytic)	Cytoplasm	enzyme
	Ush2a	Usher syndrome 2A (autosomal recessive, mild)	Extracellular Space	other
	Cenpf	centromere protein F, 350/400kDa (mitosin)	Nucleus	other
	Prox1	prospero homeobox 1	Nucleus	transcription regulator
	Angel2	angel homolog 2 (Drosophila)	Nucleus	other
	Sertad4	SERTA domain containing 4	unknown	other
	Kcnq5	potassium voltage-gated channel, KQT-like subfamily, member 5	Plasma Membrane	ion channel
	Rims1	regulating synaptic membrane exocytosis 1	Plasma Membrane	other
	Ankrd44	ankyrin repeat domain 44	unknown	other
	Aox1	aldehyde oxidase 1	Cytoplasm	enzyme
	Pcmtd1	protein-L-isoaspartate (D-aspartate) O-methyltransferase domain containing 1	Cytoplasm	enzyme
	Ctdsp1	CTD (carboxy-terminal domain, RNA polymerase II, polypeptide A) small phosphatase 1	Nucleus	phosphatase
	Tmem198	transmembrane protein 198	unknown	other
	Epha4	EPH receptor A4	Plasma Membrane	kinase
	Cul3	cullin 3	Nucleus	enzyme
	Trip12	thyroid hormone receptor interactor 12	Cytoplasm	enzyme
	Ugt1a10	UDP glucuronosyltransferase 1 family, polypeptide A8	Cytoplasm	enzyme
	Ugt1a6a	UDP glucuronosyltransferase 1 family, polypeptide A6	Cytoplasm	enzyme
	Ugt1a10;Ugt1a6b;Ugt1a6a;Ugt1a7c;Ugt1a9;Ugt1a5;Ugt1a1;Ugt1a2
	Ugt1a10;Ugt1a6b;Ugt1a6a;Ugt1a7c;Ugt1a9;Ugt1a5;Ugt1a1;Ugt1a2
	Heatr7b1	HEAT repeat containing 7B1	unknown	other
	Rrs1	RRS1 ribosome biogenesis regulator homolog (S. cerevisiae)	Nucleus	other
	Rrs1	RRS1 ribosome biogenesis regulator homolog (S. cerevisiae)	Nucleus	other
	Lrriq1	leucine-rich repeats and IQ motif containing 1	unknown	other
	Mdm1	Mdm1 nuclear protein homolog (mouse)	unknown	other
	Rdh9	retinol dehydrogenase 16 (all-trans)	Cytoplasm	enzyme
	Smarcc2	SWI/SNF related, matrix associated, actin dependent regulator of chromatin, subfamily c, member 2	Nucleus	transcription regulator
	Eya4	eyes absent homolog 4 (Drosophila)	Cytoplasm	phosphatase
	Rnf146	ring finger protein 146	Cytoplasm	enzyme
	1700012A03Rik	RIKEN cDNA 1700012A03 gene	unknown	other
	1700016H13Rik	chromosome 4 open reading frame 36	unknown	other
	1700017N19Rik	chromosome 12 open reading frame 50	unknown	other
	1700019O17Rik	chromosome 2 open reading frame 57	unknown	other
	1700020A23Rik	chromosome 20 open reading frame 141	unknown	other
	Rev3l	REV3-like, catalytic subunit of DNA polymerase zeta (yeast)	Nucleus	enzyme
	1700110M21Rik	RIKEN cDNA 1700110M21 gene	unknown	other
	1810008A18Rik	chromosome 21 open reading frame 70	unknown	other
	Aim1	absent in melanoma 1	unknown	other
	Prdm1	PR domain containing 1, with ZNF domain	Nucleus	transcription regulator
	2210415F13Rik	phospholipase inhibitor	unknown	other
	2310010M20Rik	chromosome 3 open reading frame 43	unknown	other
	4833423E24Rik	RIKEN cDNA 4833423E24 gene	unknown	other
	4930432K09Rik	chromosome 4 open reading frame 40	unknown	other
	4933404M02Rik	hypothetical protein LOC285141	unknown	other
	Zfp365	zinc finger protein 365	Cytoplasm	other
	4933412E24Rik	chromosome X open reading frame 49	unknown	other
	Dip2a	DIP2 disco-interacting protein 2 homolog A (Drosophila)	Nucleus	transcription regulator
	Tab2	TGF-beta activated kinase 1/MAP3K7 binding protein 2	Cytoplasm	other
	9030624J02Rik	chromosome 16 open reading frame 62	unknown	other
	Madcam1	mucosal vascular addressin cell adhesion molecule 1	Plasma Membrane	other
	9430007A20Rik	RIKEN cDNA 9430007A20 gene	unknown	other
	Ap3d1	adaptor-related protein complex 3, delta 1 subunit	Cytoplasm	transporter
	A430110N23Rik	scavenger receptor cysteine rich domain containing (5 domains)	unknown	other
	A4gnt	alpha-1,4-N-acetylglucosaminyltransferase	Cytoplasm	enzyme
	Tbxa2r	thromboxane A2 receptor	Plasma Membrane	G-protein coupled receptor
	Ankrd24	ankyrin repeat domain 24	unknown	other
	A230046K03Rik	KIAA1033	Cytoplasm	other
	Gpatch8	G patch domain containing 8	unknown	other
	Abcc5	ATP-binding cassette, sub-family C (CFTR/MRP), member 5	Plasma Membrane	transporter
	Abpg	androgen binding protein beta	Extracellular Space	other
	Acan	aggrecan	Extracellular Space	other
	Acan	aggrecan	Extracellular Space	other
	Accsl	1-aminocyclopropane-1-carboxylate synthase homolog (Arabidopsis)(non-functional)-like	unknown	other
	Acnat1	acyl-coenzyme A amino acid N-acyltransferase 2	Cytoplasm	enzyme
	Kcnh6	potassium voltage-gated channel, subfamily H (eag-related), member 6	Plasma Membrane	ion channel
	Bptf	bromodomain PHD finger transcription factor	Nucleus	transcription regulator
	Acsm5	acyl-CoA synthetase medium-chain family member 5	unknown	enzyme
	Acvr2a	activin A receptor, type IIA	Plasma Membrane	kinase
	Abca8b	ATP-binding cassette, sub-family A (ABC1), member 8	Plasma Membrane	transporter
	Adam26a	a disintegrin and metallopeptidase domain 26A (testase 3)	Plasma Membrane	peptidase
	Adamts14	ADAM metallopeptidase with thrombospondin type 1 motif, 14	Extracellular Space	peptidase
	Adamts3	ADAM metallopeptidase with thrombospondin type 1 motif, 3	Extracellular Space	peptidase
	Adcy1	adenylate cyclase 1 (brain)	Plasma Membrane	enzyme
	Adcy4	adenylate cyclase 4	Plasma Membrane	enzyme
	Add1	adducin 1 (alpha)	Cytoplasm	other
	Add2	adducin 2 (beta)	Cytoplasm	other
	Adra1a	adrenergic, alpha-1A-, receptor	Plasma Membrane	G-protein coupled receptor
	Adssl1	adenylosuccinate synthase like 1	Cytoplasm	enzyme
	Aebp1	AE binding protein 1	Nucleus	peptidase
	Kctd2	potassium channel tetramerisation domain containing 2	unknown	ion channel
	Afp	alpha-fetoprotein	Extracellular Space	transporter
	Nlrp3	NLR family, pyrin domain containing 3	Cytoplasm	other
	Ogdh	oxoglutarate (alpha-ketoglutarate) dehydrogenase (lipoamide)	Cytoplasm	enzyme
	Zmiz2	zinc finger, MIZ-type containing 2	Nucleus	transcription regulator
	Dnahc2	dynein, axonemal, heavy chain 2	unknown	other
	Alk	anaplastic lymphoma receptor tyrosine kinase	Plasma Membrane	kinase
	Wrap53	WD repeat containing, antisense to TP53	Nucleus	other
	Anapc2	anaphase promoting complex subunit 2	Nucleus	enzyme
	Angptl3	angiopoietin-like 3	Extracellular Space	growth factor
	Dlg4	discs, large homolog 4 (Drosophila)	Plasma Membrane	kinase
	Pelp1	proline, glutamate and leucine rich protein 1	Nucleus	other
	Anks4b	ankyrin repeat and sterile alpha motif domain containing 4B	Nucleus	transcription regulator
	Anln	anillin, actin binding protein	Cytoplasm	other
	Antxrl	anthrax toxin receptor-like	unknown	other
	Anxa10	annexin A10	Cytoplasm	other
	Ssh2	slingshot homolog 2 (Drosophila)	Cytoplasm	phosphatase
	Sez6	seizure related 6 homolog (mouse)	unknown	other
	Apc	adenomatous polyposis coli	Nucleus	enzyme
	Apcdd1	adenomatosis polyposis coli down-regulated 1	Plasma Membrane	other
	Apob	apolipoprotein B (including Ag(x) antigen)	Extracellular Space	transporter
	Apob	apolipoprotein B (including Ag(x) antigen)	Extracellular Space	transporter
	Ksr1	kinase suppressor of ras 1	Cytoplasm	kinase
	Apold1	apolipoprotein L domain containing 1	unknown	other
	Omg	oligodendrocyte myelin glycoprotein	Plasma Membrane	G-protein coupled receptor
	Arfgef2	ADP-ribosylation factor guanine nucleotide-exchange factor 2 (brefeldin A-inhibited)	Cytoplasm	other
	1700020L24Rik	chromosome 17 open reading frame 50	unknown	other
	Tubd1	tubulin, delta 1	Nucleus	other
	Abca13	ATP-binding cassette, sub-family A (ABC1), member 13	unknown	transporter
	Mycbpap	MYCBP associated protein	Nucleus	other
	Arl5b	ADP-ribosylation factor-like 5B	unknown	enzyme
	Armc4	armadillo repeat containing 4	unknown	other
	Arsj	arylsulfatase family, member J	Extracellular Space	enzyme
	Asb14	ankyrin repeat and SOCS box containing 14	unknown	other
	Asph	aspartate beta-hydroxylase	Cytoplasm	enzyme
	Astn1	astrotactin 1	unknown	other
	Asxl3	additional sex combs like 3 (Drosophila)	unknown	other
	Eml5	echinoderm microtubule associated protein like 5	unknown	other
	Kcnk13	potassium channel, subfamily K, member 13	Plasma Membrane	ion channel
	Atp12a	ATPase, H+/K+ transporting, nongastric, alpha polypeptide	Plasma Membrane	transporter
	Atp13a5	ATPase type 13A5	unknown	transporter
	Atp2b2	ATPase, Ca++ transporting, plasma membrane 2	Plasma Membrane	transporter
	Atp8a2	ATPase, aminophospholipid transporter, class I, type 8A, member 2	Plasma Membrane	transporter
	Eml1	echinoderm microtubule associated protein like 1	Cytoplasm	other
	Amn	amnionless homolog (mouse)	Plasma Membrane	other
	Avpr1a	arginine vasopressin receptor 1A	Plasma Membrane	G-protein coupled receptor
	AW551984	expressed sequence AW551984	unknown	other
	1200009I06Rik	exocyst complex component 3-like 4	unknown	other
	Zfp386	zinc finger protein 386 (Kruppel-like)	Nucleus	transcription regulator
	Bai3	brain-specific angiogenesis inhibitor 3	Plasma Membrane	G-protein coupled receptor
	Cdca7l	cell division cycle associated 7-like	Nucleus	other
	Barx2	BARX homeobox 2	Nucleus	transcription regulator
	BC051019	chromosome 11 open reading frame 16	unknown	other
	BC051665	cDNA sequence BC051665	unknown	other
	Hdac9	histone deacetylase 9	Nucleus	transcription regulator
	BC089491	selenoprotein V	unknown	other
	Best3	bestrophin 3	Nucleus	ion channel
	Bfar	bifunctional apoptosis regulator	Cytoplasm	other
	Bod1l	biorientation of chromosomes in cell division 1-like	unknown	other
	BC068281	chromosome 2 open reading frame 44	unknown	other
	Heatr5a	HEAT repeat containing 5A	unknown	other
	Btbd11	BTB (POZ) domain containing 11	Nucleus	transcription regulator
	Bzrap1	benzodiazapine receptor (peripheral) associated protein 1	Cytoplasm	other
	Heatr5a	HEAT repeat containing 5A	unknown	other
	C1rl	complement component 1, r subcomponent-like	Extracellular Space	peptidase
	4930403N07Rik	chromosome 14 open reading frame 38	unknown	other
	Cacna1b	calcium channel, voltage-dependent, N type, alpha 1B subunit	Plasma Membrane	ion channel
	Cacna1b	calcium channel, voltage-dependent, N type, alpha 1B subunit	Plasma Membrane	ion channel
	Adam21	ADAM metallopeptidase domain 21	Plasma Membrane	peptidase
	Cacna2d1	calcium channel, voltage-dependent, alpha 2/delta subunit 1	Plasma Membrane	ion channel
	Cadps	Ca++-dependent secretion activator	Plasma Membrane	other
	Papln	papilin, proteoglycan-like sulfated glycoprotein	Extracellular Space	other
	Mtap1b	microtubule-associated protein 1B	Cytoplasm	other
	Mast4	microtubule associated serine/threonine kinase family member 4	unknown	kinase
	Catsper3	cation channel, sperm associated 3	unknown	ion channel
	Ccdc130	coiled-coil domain containing 130	unknown	other
	Sgtb	small glutamine-rich tetratricopeptide repeat (TPR)-containing, beta	unknown	other
	Lyst	lysosomal trafficking regulator	Cytoplasm	transporter
	Serpinb6c	serine (or cysteine) peptidase inhibitor, clade B, member 6c	unknown	other
	Ccdc87	coiled-coil domain containing 87	unknown	other
	Ccr1l1	chemokine (C-C motif) receptor 1-like 1	Plasma Membrane	G-protein coupled receptor
	Cd209a	CD209 molecule	Plasma Membrane	other
	Cd300lb	CD300 molecule-like family member b	Plasma Membrane	other
	Cd48	CD48 molecule	Plasma Membrane	other
	Cd55	CD55 antigen	Plasma Membrane	other
	Serpinb6c	serine (or cysteine) peptidase inhibitor, clade B, member 6c	unknown	other
	Cd8a	CD8a molecule	Plasma Membrane	other
	Rreb1	ras responsive element binding protein 1	Nucleus	transcription regulator
	Cdan1	congenital dyserythropoietic anemia, type I	Nucleus	other
	Nsd1	nuclear receptor binding SET domain protein 1	Nucleus	transcription regulator
	Smad5	SMAD family member 5	Nucleus	transcription regulator
	Cdh23	cadherin-related 23	Plasma Membrane	transporter
	Cdh7	cadherin 7, type 2	Plasma Membrane	other
	Cdk11b	cyclin-dependent kinase 11B	Nucleus	kinase
	Cdkal1	CDK5 regulatory subunit associated protein 1-like 1	unknown	other
	Cecr2	cat eye syndrome chromosome region, candidate 2	Nucleus	other
	Kif27	kinesin family member 27	Cytoplasm	other
	0610007P08Rik	chromosome 9 open reading frame 102	unknown	enzyme
	Nlrp4f	NLR family, pyrin domain containing 4F	unknown	other
	Ces1b	carboxylesterase 1C	Cytoplasm	enzyme
	Ces1d	carboxylesterase 1	Cytoplasm	enzyme
	Ces1g	carboxylesterase 1G	Cytoplasm	enzyme
	Nsun2	NOP2/Sun domain family, member 2	unknown	enzyme
	Chi3l1	chitinase 3-like 1 (cartilage glycoprotein-39)	Extracellular Space	enzyme
	Chrd	chordin	Extracellular Space	other
	Chrm2	cholinergic receptor, muscarinic 2	Plasma Membrane	G-protein coupled receptor
	Cit	citron (rho-interacting, serine/threonine kinase 21)	Cytoplasm	kinase
	2210408I21Rik	KIAA0825	unknown	other
	Hapln1	hyaluronan and proteoglycan link protein 1	Extracellular Space	other
	Cmya5	cardiomyopathy associated 5	Plasma Membrane	other
	Cldn4	claudin 4	Plasma Membrane	transmembrane receptor
	Clu	clusterin	Extracellular Space	other
	Jmy	junction mediating and regulatory protein, p53 cofactor	Nucleus	transcription regulator
	Cntnap4	contactin associated protein-like 4	Plasma Membrane	other
	Col17a1	collagen, type XVII, alpha 1	Plasma Membrane	other
	Col19a1	collagen, type XIX, alpha 1	Extracellular Space	other
	Col6a1	collagen, type VI, alpha 1	Extracellular Space	other
	Colec12	collectin sub-family member 12	Plasma Membrane	transmembrane receptor
	Tbc1d4	TBC1 domain family, member 4	Cytoplasm	other
	Cpsf6	cleavage and polyadenylation specific factor 6, 68kDa	Nucleus	other
	Zic2	Zic family member 2	Nucleus	transcription regulator
	Crhr2	corticotropin releasing hormone receptor 2	Plasma Membrane	G-protein coupled receptor
	Crispld1	cysteine-rich secretory protein LCCL domain containing 1	unknown	other
	Il3ra	interleukin 3 receptor, alpha (low affinity)	Plasma Membrane	transmembrane receptor
	Dlg5	discs, large homolog 5 (Drosophila)	Plasma Membrane	other
	Csmd3	CUB and Sushi multiple domains 3	unknown	enzyme
	Polr3a	polymerase (RNA) III (DNA directed) polypeptide A, 155kDa	Nucleus	enzyme
	Ctcfl	CCCTC-binding factor (zinc finger protein)-like	Nucleus	transcription regulator
	Dnahc1	dynein, axonemal, heavy chain 1	unknown	other
	Ctnna3	catenin (cadherin-associated protein), alpha 3	Plasma Membrane	other
	Ctnnd2	catenin (cadherin-associated protein), delta 2 (neural plakophilin-related arm-repeat protein)	Plasma Membrane	other
	Pnp	purine nucleoside phosphorylase	Nucleus	enzyme
	Tssk4	testis-specific serine kinase 4	unknown	kinase
	Ctsq	cathepsin Q	Cytoplasm	peptidase
	Gja3	gap junction protein, alpha 3, 46kDa	Plasma Membrane	transporter
	Fbxo16	F-box protein 16	unknown	other
	Cxcl16	chemokine (C-X-C motif) ligand 16	Extracellular Space	cytokine
	Cyp2c68	cytochrome P450, family 2, subfamily c, polypeptide 40	Cytoplasm	enzyme
	Cyp2c69
	Cyp2f2	cytochrome P450, family 2, subfamily F, polypeptide 1	Cytoplasm	enzyme
	Cyp2g1	cytochrome P450, family 2, subfamily G, polypeptide 1 pseudogene	Cytoplasm	enzyme
	Cyp2r1	cytochrome P450, family 2, subfamily R, polypeptide 1	Cytoplasm	enzyme
	Cyp2t4	cytochrome P450, family 2, subfamily t, polypeptide 4	unknown	other
	Cyp3a59	cytochrome P450, family 3, subfamily A, polypeptide 43	Cytoplasm	enzyme
	D7Ertd443e	chromosome 10 open reading frame 90	unknown	other
	Dab1	disabled homolog 1 (Drosophila)	Cytoplasm	other
	Dapk2	death-associated protein kinase 2	Cytoplasm	kinase
	Dcaf13	DDB1 and CUL4 associated factor 13	Nucleus	other
	Cdca2	cell division cycle associated 2	Nucleus	other
	Lrrc63	leucine rich repeat containing 63	unknown	transcription regulator
	Dda1	DET1 and DDB1 associated 1	unknown	other
	Gtf2f2	general transcription factor IIF, polypeptide 2, 30kDa	Nucleus	transcription regulator
	Ddn	dendrin	Plasma Membrane	other
	Pcdh17	protocadherin 17	unknown	other
	Ddx59	DEAD (Asp-Glu-Ala-Asp) box polypeptide 59	unknown	enzyme
	Defb14	defensin, beta 103B	Extracellular Space	other
	Defb8	defensin beta 8	Extracellular Space	other
	Defb9	defensin beta 9	Extracellular Space	other
	Dennd1a	DENN/MADD domain containing 1A	Plasma Membrane	other
	Flnb	filamin B, beta	Cytoplasm	other
	Krt1	keratin 1	Cytoplasm	other
	Dennd5a	DENN/MADD domain containing 5A	Cytoplasm	other
	Krt76	keratin 76	Cytoplasm	other
	Hoxc4	homeobox C4	Nucleus	transcription regulator
	Tars	threonyl-tRNA synthetase	Nucleus	enzyme
	Pop1	processing of precursor 1, ribonuclease P/MRP subunit (S. cerevisiae)	Nucleus	enzyme
	Enpp2	ectonucleotide pyrophosphatase/phosphodiesterase 2	Plasma Membrane	enzyme
	Klhl38	kelch-like 38 (Drosophila)	unknown	other
	Dlgap2	discs, large (Drosophila) homolog-associated protein 2	Plasma Membrane	other
	Dlx5	distal-less homeobox 5	Nucleus	transcription regulator
	Zfat	zinc finger and AT hook domain containing	Nucleus	other
	Gsdmd	gasdermin D	unknown	other
	Dmrt2	doublesex and mab-3 related transcription factor 2	Nucleus	transcription regulator
	Scrib	scribbled homolog (Drosophila)	Cytoplasm	other
	Srebf2	sterol regulatory element binding transcription factor 2	Nucleus	transcription regulator
	Dnahc6	dynein, axonemal, heavy chain 6	unknown	other
	Dhh	desert hedgehog	Extracellular Space	peptidase
	Dnajb8	DnaJ (Hsp40) homolog, subfamily B, member 8	unknown	other
	Rsl1d1	ribosomal L1 domain containing 1	Cytoplasm	other
	Dnmbp	dynamin binding protein	Cytoplasm	other
	Abcc1	ATP-binding cassette, sub-family C (CFTR/MRP), member 1	Plasma Membrane	transporter
	Rimbp3	RIMS binding protein 3	Nucleus	other
	Dock2	dedicator of cytokinesis 2	Cytoplasm	other
	Dock2	dedicator of cytokinesis 2	Cytoplasm	other
	Dsc2	desmocollin 2	Plasma Membrane	other
	Dscam	Down syndrome cell adhesion molecule	Plasma Membrane	other
	Ccdc14	coiled-coil domain containing 14	Cytoplasm	other
	Parp14	poly (ADP-ribose) polymerase family, member 14	Cytoplasm	other
	Dusp27	dual specificity phosphatase 27 (putative)	unknown	phosphatase
	Wdr5b	WD repeat domain 5B	unknown	other
	E030002O03Rik	RIKEN cDNA E030002O03 gene	Extracellular Space	other
	Slc15a2	solute carrier family 15 (H+/peptide transporter), member 2	Plasma Membrane	transporter
	Tmem39a	transmembrane protein 39A	unknown	other
	Ppl	periplakin	Cytoplasm	other
	Nfkbiz	nuclear factor of kappa light polypeptide gene enhancer in B-cells inhibitor, zeta	Nucleus	transcription regulator
	Hspa13	heat shock protein 70kDa family, member 13	Cytoplasm	other
	App	amyloid beta (A4) precursor protein	Plasma Membrane	other
	Urb1	URB1 ribosome biogenesis 1 homolog (S. cerevisiae)	Nucleus	other
	Ephx2	epoxide hydrolase 2, cytoplasmic	Cytoplasm	enzyme
	Dopey2	dopey family member 2	Cytoplasm	other
	Mllt4	myeloid/lymphoid or mixed-lineage leukemia (trithorax homolog, Drosophila); translocated to, 4	Nucleus	other
	F11	coagulation factor XI	Extracellular Space	peptidase
	F13a1	coagulation factor XIII, A1 polypeptide	Extracellular Space	enzyme
	Abca17	ATP-binding cassette, sub-family A (ABC1), member 17	Cytoplasm	other
	Fam38b	family with sequence similarity 38, member B	unknown	other
	Fam5b	family with sequence similarity 5, member B	Cytoplasm	other
	Fam71b	family with sequence similarity 71, member B	unknown	other
	Abca17	ATP-binding cassette, sub-family A (ABC1), member 17	Cytoplasm	other
	Fancd2	Fanconi anemia, complementation group D2	Nucleus	other
	Abca17	ATP-binding cassette, sub-family A (ABC1), member 17	Cytoplasm	other
	Fbn1	fibrillin 1	Extracellular Space	other
	Pkd1	polycystic kidney disease 1 (autosomal dominant)	Plasma Membrane	ion channel
	Baiap3	BAI1-associated protein 3	unknown	other
	Fga	fibrinogen alpha chain	Extracellular Space	other
	Fgd4	FYVE, RhoGEF and PH domain containing 4	Cytoplasm	other
	Fgfbp1	fibroblast growth factor binding protein 1	Extracellular Space	other
	Fgfr2	fibroblast growth factor receptor 2	Plasma Membrane	kinase
	Rgs11	regulator of G-protein signaling 11	Plasma Membrane	enzyme
	Itpr3	inositol 1,4,5-trisphosphate receptor, type 3	Cytoplasm	ion channel
	AI413582	chromosome 6 open reading frame 1	unknown	other
	Flt1	fms-related tyrosine kinase 1 (vascular endothelial growth factor/vascular permeability factor receptor)	Plasma Membrane	kinase
	Fn1	fibronectin 1	Extracellular Space	enzyme
	Folh1	folate hydrolase	Plasma Membrane	peptidase
	Dnahc8	dynein, axonemal, heavy chain 8	Cytoplasm	enzyme
	Fpr-rs4	formyl peptide receptor, related sequence 4	Plasma Membrane	G-protein coupled receptor
	Fpr-rs4	formyl peptide receptor, related sequence 4	Plasma Membrane	G-protein coupled receptor
	Dnahc8	dynein, axonemal, heavy chain 8	Cytoplasm	enzyme
	Notch3	notch 3	Plasma Membrane	transcription regulator
	Frmd7	FERM domain containing 7	Plasma Membrane	other
	Wiz	widely interspaced zinc finger motifs	Nucleus	other
	Zfp870	zinc finger protein 870	unknown	other
	Morc2b	microrchidia 2B	unknown	other
	Gal3st1	galactose-3-O-sulfotransferase 1	Cytoplasm	enzyme
	Tiam2	T-cell lymphoma invasion and metastasis 2	Cytoplasm	enzyme
	Gcm2	glial cells missing homolog 2 (Drosophila)	Nucleus	transcription regulator
	Gdf10	growth differentiation factor 10	Extracellular Space	growth factor
	H2-Gs10	MHC class I like protein GS10	unknown	other
	Gga1	golgi-associated, gamma adaptin ear containing, ARF binding protein 1	Cytoplasm	transporter
	Supt3h	suppressor of Ty 3 homolog (S. cerevisiae)	Nucleus	transcription regulator
	Gje1	gap junction protein, epsilon 1	unknown	other
	Ptcra	pre T-cell antigen receptor alpha	Cytoplasm	other
	Glyat	glycine-N-acyltransferase	Cytoplasm	enzyme
	Tbc1d5	TBC1 domain family, member 5	unknown	other
	Gm13078	PRAME family member 5	unknown	other
	Gm14160
	Gm364	predicted gene 364	unknown	other
	Gm4981	predicted gene 4981	unknown	other
	Gm5347	predicted gene 5347	unknown	other
	Gm5631	solute carrier family 22 (organic anion transporter), member 9	Plasma Membrane	transporter
	Gm8267	predicted gene 8267	unknown	other
	Gm8787	predicted gene 8787	unknown	other
	Gm8787	predicted gene 8787	unknown	other
	Fsd1	fibronectin type III and SPRY domain containing 1	Cytoplasm	other
	Gm9758	spermatogenesis associated glutamate (E)-rich protein 4a	Nucleus	other
	Stap2	signal transducing adaptor family member 2	Cytoplasm	other
	Lama1	laminin, alpha 1	Extracellular Space	other
	Gorab	golgin, RAB6-interacting	Cytoplasm	other
	Lama1	laminin, alpha 1	Extracellular Space	other
	Gphb5	glycoprotein hormone beta 5	Extracellular Space	other
	Gpr113	G protein-coupled receptor 113	Plasma Membrane	G-protein coupled receptor
	Gpr75	G protein-coupled receptor 75	Plasma Membrane	G-protein coupled receptor
	Gpr98	G protein-coupled receptor 98	Plasma Membrane	G-protein coupled receptor
	Lama1	laminin, alpha 1	Extracellular Space	other
	Grid1	glutamate receptor, ionotropic, delta 1	Plasma Membrane	ion channel
	Grm3	glutamate receptor, metabotropic 3	Plasma Membrane	G-protein coupled receptor
	Arhgap28	Rho GTPase activating protein 28	Cytoplasm	other
	Fam179a	family with sequence similarity 179, member A	unknown	other
	Xdh	xanthine dehydrogenase	Cytoplasm	enzyme
	Guca1a	guanylate cyclase activator 1A (retina)	Cytoplasm	other
	Gykl1	glycerol kinase-like 1	Cytoplasm	kinase
	Xdh	xanthine dehydrogenase	Cytoplasm	enzyme
	Hao2	hydroxyacid oxidase 2 (long chain)	Cytoplasm	enzyme
	Dhx57	DEAH (Asp-Glu-Ala-Asp/His) box polypeptide 57	unknown	other
	Hc	complement component 5	Extracellular Space	cytokine
	Hccs	holocytochrome c synthase	Cytoplasm	enzyme
	Mta3	metastasis associated 1 family, member 3	Nucleus	other
	Nol4	nucleolar protein 4	Nucleus	other
	Celf4	CUGBP, Elav-like family member 4	Nucleus	translation regulator
	Pcdha2	protocadherin alpha 2	Plasma Membrane	other
	Heph	hephaestin	Plasma Membrane	transporter
	Hephl1	hephaestin-like 1	unknown	other
	Herc2	hect domain and RLD 2	Cytoplasm	enzyme
	Pcdhac1	protocadherin alpha subfamily C, 1	Plasma Membrane	other
	Pcdhac1	protocadherin alpha subfamily C, 1	Plasma Membrane	other
	Pcdhb6	protocadherin beta 6	Extracellular Space	other
	Hgf	hepatocyte growth factor (hepapoietin A; scatter factor)	Extracellular Space	growth factor
	Pcdhb21	protocadherin beta 11	Plasma Membrane	other
	Pcdhb22	protocadherin beta 15	Plasma Membrane	other
	Hmg20b	high mobility group 20B	Nucleus	transcription regulator
	Arhgap26	Rho GTPase activating protein 26	Cytoplasm	other
	Gnal	guanine nucleotide binding protein (G protein), alpha activating activity polypeptide, olfactory type	Cytoplasm	enzyme
	Hsd3b3	hydroxy-delta-5-steroid dehydrogenase, 3 beta- and steroid delta-isomerase 3	Cytoplasm	enzyme
	Hsd3b6	hydroxy-delta-5-steroid dehydrogenase, 3 beta- and steroid delta-isomerase 1	Cytoplasm	enzyme
	Hsf3	heat shock transcription factor 3	unknown	other
	Hsf3	heat shock transcription factor 3	unknown	other
	Rnmt	RNA (guanine-7-) methyltransferase	Nucleus	enzyme
	Hspa4l	heat shock 70kDa protein 4-like	Cytoplasm	other
	Hydin	hydrocephalus inducing homolog (mouse)	unknown	other
	Hydin	hydrocephalus inducing homolog (mouse)	unknown	other
	I830077J02Rik	chromosome 1 open reading frame 162	unknown	transporter
	Iars	isoleucyl-tRNA synthetase	Cytoplasm	enzyme
	Zadh2	zinc binding alcohol dehydrogenase domain containing 2	Cytoplasm	enzyme
	Gm98	chromosome 11 open reading frame 9	Nucleus	transcription regulator
	Ik	IK cytokine, down-regulator of HLA II	Extracellular Space	cytokine
	Il18r1	interleukin 18 receptor 1	Plasma Membrane	transmembrane receptor
	Rfx3	regulatory factor X, 3 (influences HLA class II expression)	Nucleus	transcription regulator
	Inpp5f	inositol polyphosphate-5-phosphatase F	unknown	other
	Ermp1	endoplasmic reticulum metallopeptidase 1	Cytoplasm	other
	Itgb6	integrin, beta 6	Plasma Membrane	other
	Pten	phosphatase and tensin homolog	Cytoplasm	phosphatase
	Jag1	jagged 1	Extracellular Space	growth factor
	Jmjd1c	jumonji domain containing 1C	Nucleus	other
	9130011E15Rik	chromosome 10 open reading frame 76	unknown	other
	Jph1	junctophilin 1	Plasma Membrane	other
	Jph2	junctophilin 2	Cytoplasm	enzyme
	Kcna7	potassium voltage-gated channel, shaker-related subfamily, member 7	Plasma Membrane	ion channel
	Gm962	DKFZp761E198 protein	unknown	other
	Kcnb2	potassium voltage-gated channel, Shab-related subfamily, member 2	Plasma Membrane	ion channel
	Kcnb2	potassium voltage-gated channel, Shab-related subfamily, member 2	Plasma Membrane	ion channel
	Kcnh5	potassium voltage-gated channel, subfamily H (eag-related), member 5	Plasma Membrane	ion channel
	Kcnh5	potassium voltage-gated channel, subfamily H (eag-related), member 5	Plasma Membrane	ion channel
	Ehbp1l1	EH domain binding protein 1-like 1	Cytoplasm	other
	Kcnh7	potassium voltage-gated channel, subfamily H (eag-related), member 7	Plasma Membrane	ion channel
	Kcnh8	potassium voltage-gated channel, subfamily H (eag-related), member 8	Plasma Membrane	ion channel
	Kcnk9	potassium channel, subfamily K, member 9	Plasma Membrane	ion channel
	Kcnn3	potassium intermediate/small conductance calcium-activated channel, subfamily N, member 3	Plasma Membrane	ion channel
	Kcnt2	potassium channel, subfamily T, member 2	Plasma Membrane	ion channel
	Kctd19	potassium channel tetramerisation domain containing 19	unknown	other
	Slc22a12	solute carrier family 22 (organic anion/urate transporter), member 12	Plasma Membrane	transporter
	Kif20b	kinesin family member 20B	Nucleus	enzyme
	Ahnak	AHNAK nucleoprotein	Nucleus	other
	Cd59b	CD59 molecule, complement regulatory protein	Plasma Membrane	other
	Kifc2	kinesin family member C2	Cytoplasm	other
	Rtf1	Rtf1, Paf1/RNA polymerase II complex component, homolog (S. cerevisiae)	Nucleus	other
	Tyro3	TYRO3 protein tyrosine kinase	Plasma Membrane	kinase
	Klk1b26	kallikrein 1-related pepidase b4	Extracellular Space	peptidase
	Klk1b3	kallikrein 1-related pepidase b4	Extracellular Space	peptidase
	Klk5	kallikrein-related peptidase 5	Extracellular Space	peptidase
	Klk6	kallikrein-related peptidase 6	Extracellular Space	peptidase
	Klra10	killer cell lectin-like receptor, subfamily A, member 4	Plasma Membrane	transmembrane receptor
	Klra15;Klra22;Klra1
	Klra2	killer cell lectin-like receptor subfamily A pseudogene 1	Plasma Membrane	transmembrane receptor
	Trp53bp1	tumor protein p53 binding protein 1	Nucleus	transcription regulator
	Eif3j	eukaryotic translation initiation factor 3, subunit J	Cytoplasm	translation regulator
	Trpm7	transient receptor potential cation channel, subfamily M, member 7	Plasma Membrane	kinase
	Krt16	keratin 16	Cytoplasm	other
	Sirpa	signal-regulatory protein alpha	Plasma Membrane	phosphatase
	AU015228	expressed sequence AU015228	unknown	other
	Cubn	cubilin (intrinsic factor-cobalamin receptor)	Plasma Membrane	transmembrane receptor
	Rrbp1	ribosome binding protein 1 homolog 180kDa (dog)	Cytoplasm	transporter
	Lce1f	late cornified envelope 1F	unknown	other
	Lefty2	left-right determination factor 2	Extracellular Space	growth factor
	Lelp1	late cornified envelope-like proline-rich 1	unknown	other
	Lenep	lens epithelial protein	Cytoplasm	other
	Lmtk2	lemur tyrosine kinase 2	Cytoplasm	kinase
	Lpcat2b	lysophosphatidylcholine acyltransferase 2B	unknown	other
	Lrp1	low density lipoprotein receptor-related protein 1	Plasma Membrane	transmembrane receptor
	Lrpprc	leucine-rich PPR-motif containing	Cytoplasm	other
	Lrrc16b	leucine rich repeat containing 16B	unknown	other
	Lrrc18	leucine rich repeat containing 18	Cytoplasm	other
	Pdrg1	p53 and DNA-damage regulated 1	Cytoplasm	other
	Lrrc30	leucine rich repeat containing 30	unknown	other
	Lrrc32	leucine rich repeat containing 32	Plasma Membrane	other
	Ptprt	protein tyrosine phosphatase, receptor type, T	Plasma Membrane	phosphatase
	Lrrc8a	leucine rich repeat containing 8 family, member A	unknown	other
	Ift52	intraflagellar transport 52 homolog (Chlamydomonas)	Cytoplasm	other
	Ltbp4	latent transforming growth factor beta binding protein 4	Extracellular Space	growth factor
	Fitm2	fat storage-inducing transmembrane protein 2	Cytoplasm	other
	Lyzl1	lysozyme-like 1	unknown	enzyme
	Acot8	acyl-CoA thioesterase 8	Cytoplasm	enzyme
	Magel2	MAGE-like 2	unknown	other
	Maml2	mastermind-like 2 (Drosophila)	Nucleus	transcription regulator
	Kcnb1	potassium voltage-gated channel, Shab-related subfamily, member 1	Plasma Membrane	ion channel
	March10	membrane-associated ring finger (C3HC4) 10	unknown	other
	Sec16a	SEC16 homolog A (S. cerevisiae)	Cytoplasm	phosphatase
	Mcpt4	mast cell protease 4	Extracellular Space	peptidase
	Notch1	notch 1	Plasma Membrane	transcription regulator
	Phyhd1	phytanoyl-CoA dioxygenase domain containing 1	unknown	other
	Megf11	multiple EGF-like-domains 11	unknown	other
	Megf8	multiple EGF-like-domains 8	unknown	other
	Mep1a	meprin A, alpha (PABA peptide hydrolase)	Plasma Membrane	peptidase
	Nup214	nucleoporin 214kDa	Nucleus	transporter
	Prrc2b	proline-rich coiled-coil 2B	unknown	other
	Ttc16	tetratricopeptide repeat domain 16	unknown	other
	Ttc16	tetratricopeptide repeat domain 16	unknown	other
	Dclre1c	DNA cross-link repair 1C	Nucleus	enzyme
	Mpo	myeloperoxidase	Cytoplasm	enzyme
	Mrgprb4	MAS-related GPR, member B5	unknown	other
	Mta1	metastasis associated 1	Nucleus	transcription regulator
	Neb	nebulin	Cytoplasm	other
	Slc4a10	solute carrier family 4, sodium bicarbonate transporter, member 10	Plasma Membrane	transporter
	Fign	fidgetin	Nucleus	other
	Muc4	mucin 4, cell surface associated	Extracellular Space	growth factor
	Muc5b	mucin 5AC, oligomeric mucus/gel-forming	Extracellular Space	peptidase
	Mup3	major urinary protein 1	Extracellular Space	other
	Ttc30b	tetratricopeptide repeat domain 30B	unknown	other
	Mxra7	matrix-remodelling associated 7	unknown	other
	Ttn	titin	Cytoplasm	kinase
	Ttn	titin	Cytoplasm	kinase
	Myo18b	myosin XVIIIB	Cytoplasm	other
	Myo1d	myosin ID	Plasma Membrane	other
	Myst3	MYST histone acetyltransferase (monocytic leukemia) 3	Nucleus	enzyme
	Nap1l2	nucleosome assembly protein 1-like 2	Nucleus	other
	Ttn	titin	Cytoplasm	kinase
	Ttn	titin	Cytoplasm	kinase
	Ccdc141	coiled-coil domain containing 141	unknown	other
	Olfr1058	olfactory receptor 1058	Plasma Membrane	G-protein coupled receptor
	Olfr1058	olfactory receptor 1058	Plasma Membrane	G-protein coupled receptor
	Ndn	necdin homolog (mouse)	Nucleus	other
	Ptgfrn	prostaglandin F2 receptor negative regulator	Plasma Membrane	other
	Neurod6	neurogenic differentiation 6	Nucleus	other
	Hipk1	homeodomain interacting protein kinase 1	Nucleus	kinase
	Celsr2	cadherin, EGF LAG seven-pass G-type receptor 2 (flamingo homolog, Drosophila)	Plasma Membrane	G-protein coupled receptor
	Pla2g12a	phospholipase A2, group XIIA	Extracellular Space	enzyme
	Nin	ninein (GSK3B interacting protein)	Cytoplasm	other
	Nipbl	Nipped-B homolog (Drosophila)	Nucleus	transcription regulator
	Nlrp14	NLR family, pyrin domain containing 14	unknown	other
	Papss1	3'-phosphoadenosine 5'-phosphosulfate synthase 1	Cytoplasm	enzyme
	Nlrp4a	NLR family, pyrin domain containing 4A	unknown	other
	Ddit4l	DNA-damage-inducible transcript 4-like	Cytoplasm	other
	Nlrp5	NLR family, pyrin domain containing 5	Cytoplasm	other
	Tspan5	tetraspanin 5	Plasma Membrane	other
	Gbp2	guanylate binding protein 2, interferon-inducible	Cytoplasm	enzyme
	St6galnac3	ST6 (alpha-N-acetyl-neuraminyl-2,3-beta-galactosyl-1,3)-N-acetylgalactosaminide alpha-2,6-sialyltransferase 3	Cytoplasm	enzyme
	Nr4a2	nuclear receptor subfamily 4, group A, member 2	Nucleus	ligand-dependent nuclear receptor
	Nrbp2	nuclear receptor binding protein 2	Cytoplasm	other
	Slc7a14	solute carrier family 7 (cationic amino acid transporter, y+ system), member 14	unknown	other
	Ntn5	netrin 5	unknown	other
	Nudt4	nudix (nucleoside diphosphate linked moiety X)-type motif 4	Cytoplasm	phosphatase
	Atp11b	ATPase, class VI, type 11B	Plasma Membrane	transporter
	4932438A13Rik	KIAA1109	unknown	other
	Nxph2	neurexophilin 2	Extracellular Space	other
	Ocln	occludin	Plasma Membrane	enzyme
	Odf1	outer dense fiber of sperm tails 1	Cytoplasm	other
	Dclk1	doublecortin-like kinase 1	Plasma Membrane	kinase
	Olfr1014	olfactory receptor, family 9, subfamily G, member 1	Plasma Membrane	G-protein coupled receptor
	Olfr1026	olfactory receptor 1026	Plasma Membrane	G-protein coupled receptor
	Olfr103	olfactory receptor 103	Plasma Membrane	G-protein coupled receptor
	Olfr1047	olfactory receptor, family 8, subfamily K, member 3	Plasma Membrane	G-protein coupled receptor
	Olfr1051	olfactory receptor 1049	Plasma Membrane	G-protein coupled receptor
	Olfr1056	olfactory receptor 1056	Plasma Membrane	G-protein coupled receptor
	Igsf10	immunoglobulin superfamily, member 10	unknown	other
	Olfr1083
	Olfr1093	olfactory receptor, family 5, subfamily T, member 3	Plasma Membrane	G-protein coupled receptor
	Olfr1106	olfactory receptor 1106	Plasma Membrane	G-protein coupled receptor
	Olfr1113	olfactory receptor 1113	Plasma Membrane	G-protein coupled receptor
	Olfr1116-ps	olfactory receptor 1116, pseudogene	Plasma Membrane	G-protein coupled receptor
	Olfr1124	olfactory receptor 1124	Plasma Membrane	G-protein coupled receptor
	Olfr1129	olfactory receptor 1129	Plasma Membrane	G-protein coupled receptor
	Olfr1134	olfactory receptor 1134	Plasma Membrane	G-protein coupled receptor
	Olfr1134	olfactory receptor 1134	Plasma Membrane	G-protein coupled receptor
	Olfr1140	olfactory receptor 1140	Plasma Membrane	G-protein coupled receptor
	Olfr1145	olfactory receptor 1145	Plasma Membrane	G-protein coupled receptor
	Olfr1153	olfactory receptor 1153	Plasma Membrane	G-protein coupled receptor
	Olfr1165-ps	olfactory receptor 1165, pseudogene	Plasma Membrane	G-protein coupled receptor
	Olfr120	olfactory receptor 118	Plasma Membrane	G-protein coupled receptor
	Olfr1215	olfactory receptor 1215	Plasma Membrane	G-protein coupled receptor
	Olfr1259	olfactory receptor, family 4, subfamily C, member 12	Plasma Membrane	G-protein coupled receptor
	Olfr1265	olfactory receptor, family 4, subfamily X, member 2	Plasma Membrane	G-protein coupled receptor
	Olfr1294	olfactory receptor 1294	Plasma Membrane	G-protein coupled receptor
	Olfr1341	olfactory receptor 1341	Plasma Membrane	G-protein coupled receptor
	Olfr1385	olfactory receptor, family 2, subfamily Y, member 1	Plasma Membrane	G-protein coupled receptor
	Olfr1387	olfactory receptor 1387	Plasma Membrane	G-protein coupled receptor
	Olfr1440	olfactory receptor 1440	Plasma Membrane	G-protein coupled receptor
	Olfr1453	olfactory receptor 1454	Plasma Membrane	G-protein coupled receptor
	Olfr146	olfactory receptor 936	unknown	G-protein coupled receptor
	Olfr1480	olfactory receptor 1480	Plasma Membrane	G-protein coupled receptor
	Olfr1489	olfactory receptor 1489	Plasma Membrane	G-protein coupled receptor
	Olfr1495	olfactory receptor 1495	Plasma Membrane	G-protein coupled receptor
	Olfr1509	olfactory receptor, family 4, subfamily E, member 2	Plasma Membrane	G-protein coupled receptor
	Olfr152	olfactory receptor, family 5, subfamily I, member 1	Plasma Membrane	G-protein coupled receptor
	Olfr154	olfactory receptor 154	Plasma Membrane	G-protein coupled receptor
	Olfr16	olfactory receptor, family 10, subfamily J, member 5	Plasma Membrane	G-protein coupled receptor
	Olfr23	olfactory receptor 23	Plasma Membrane	G-protein coupled receptor
	Olfr231	olfactory receptor, family 6, subfamily K, member 6	Plasma Membrane	G-protein coupled receptor
	Olfr266	olfactory receptor 266	Plasma Membrane	G-protein coupled receptor
	Olfr299	olfactory receptor 299	Plasma Membrane	G-protein coupled receptor
	Olfr319	olfactory receptor 319	Plasma Membrane	G-protein coupled receptor
	Olfr340	olfactory receptor 340	Plasma Membrane	G-protein coupled receptor
	Olfr352	olfactory receptor 352	Plasma Membrane	G-protein coupled receptor
	Olfr358	olfactory receptor 358	Plasma Membrane	G-protein coupled receptor
	Olfr367-ps	olfactory receptor 367, pseudogene	unknown	other
	Olfr373	olfactory receptor, family 2, subfamily Z, member 1	Plasma Membrane	G-protein coupled receptor
	Olfr378	olfactory receptor 378	Plasma Membrane	G-protein coupled receptor
	Olfr410	olfactory receptor, family 3, subfamily A, member 1	Plasma Membrane	G-protein coupled receptor
	Olfr448	olfactory receptor, family 2, subfamily A, member 5	Plasma Membrane	G-protein coupled receptor
	Olfr450	olfactory receptor 450	Plasma Membrane	G-protein coupled receptor
	Olfr477	olfactory receptor 476	Plasma Membrane	G-protein coupled receptor
	Olfr480	olfactory receptor, family 5, subfamily P, member 3	Plasma Membrane	G-protein coupled receptor
	Olfr502	olfactory receptor 502	Plasma Membrane	G-protein coupled receptor
	Olfr512	olfactory receptor 512	Plasma Membrane	G-protein coupled receptor
	Olfr513	olfactory receptor 513	Plasma Membrane	G-protein coupled receptor
	Olfr514	olfactory receptor 514	Plasma Membrane	G-protein coupled receptor
	Olfr53	olfactory receptor 53	Plasma Membrane	G-protein coupled receptor
	Olfr536	olfactory receptor 536	Plasma Membrane	G-protein coupled receptor
	Olfr591	olfactory receptor 591	Plasma Membrane	G-protein coupled receptor
	Olfr60	olfactory receptor 60	Plasma Membrane	G-protein coupled receptor
	Olfr615	olfactory receptor 615	Plasma Membrane	G-protein coupled receptor
	Olfr615	olfactory receptor 615	Plasma Membrane	G-protein coupled receptor
	Olfr643	olfactory receptor 643	Plasma Membrane	G-protein coupled receptor
	Olfr663	olfactory receptor 663	Plasma Membrane	G-protein coupled receptor
	Olfr665	olfactory receptor 665	Plasma Membrane	G-protein coupled receptor
	Olfr667	olfactory receptor 667	Plasma Membrane	G-protein coupled receptor
	Olfr693	olfactory receptor 693	Plasma Membrane	G-protein coupled receptor
	Olfr697	olfactory receptor 697	Plasma Membrane	G-protein coupled receptor
	Olfr706	olfactory receptor, family 2, subfamily AG, member 2	Plasma Membrane	G-protein coupled receptor
	Olfr714	olfactory receptor, family 10, subfamily A, member 2	Plasma Membrane	G-protein coupled receptor
	Olfr716	olfactory receptor 716	Plasma Membrane	G-protein coupled receptor
	Olfr77	olfactory receptor 77	Plasma Membrane	G-protein coupled receptor
	Olfr770	olfactory receptor 770	Plasma Membrane	G-protein coupled receptor
	Olfr807	olfactory receptor 807	Plasma Membrane	G-protein coupled receptor
	Olfr821	olfactory receptor, family 6, subfamily C, member 74	Plasma Membrane	G-protein coupled receptor
	Olfr832	olfactory receptor, family 7, subfamily G, member 3	Plasma Membrane	G-protein coupled receptor
	Olfr847	olfactory receptor 847	Plasma Membrane	G-protein coupled receptor
	Olfr866	olfactory receptor, family 7, subfamily E, member 5 pseudogene	Plasma Membrane	G-protein coupled receptor
	Olfr911-ps1	olfactory receptor 911, pseudogene 1	Plasma Membrane	G-protein coupled receptor
	Olfr945	olfactory receptor 945	unknown	G-protein coupled receptor
	Atp8b2	ATPase, class I, type 8B, member 2	Plasma Membrane	transporter
	Creb3l4	cAMP responsive element binding protein 3-like 4	Nucleus	transcription regulator
	Pah	phenylalanine hydroxylase	Cytoplasm	enzyme
	Pogz	pogo transposable element with ZNF domain	Nucleus	enzyme
	Pi4kb	phosphatidylinositol 4-kinase, catalytic, beta	Cytoplasm	kinase
	Pdzk1	PDZ domain containing 1	Plasma Membrane	transporter
	Pcbp3	poly(rC) binding protein 3	Nucleus	other
	Wdr3	WD repeat domain 3	Cytoplasm	other
	Dnajc6	DnaJ (Hsp40) homolog, subfamily C, member 6	Cytoplasm	other
	Gm12794	predicted gene 12800	unknown	other
	Glis1	GLIS family zinc finger 1	Nucleus	transcription regulator
	Stil	SCL/TAL1 interrupting locus	Nucleus	other
	Hpdl	4-hydroxyphenylpyruvate dioxygenase-like	unknown	other
	Ipo13	importin 13	Nucleus	transporter
	Thrap3	thyroid hormone receptor associated protein 3	Nucleus	transcription regulator
	C77080	KIAA1522	unknown	other
	Pcnxl2	pecanex-like 2 (Drosophila)	unknown	other
	Pcsk5	proprotein convertase subtilisin/kexin type 5	Extracellular Space	peptidase
	Tmem39b	transmembrane protein 39B	Cytoplasm	other
	Pde4a	phosphodiesterase 4A, cAMP-specific	Cytoplasm	enzyme
	Spata21	spermatogenesis associated 21	unknown	other
	Pdk4	pyruvate dehydrogenase kinase, isozyme 4	Cytoplasm	kinase
	D4Ertd22e	chromosome 1 open reading frame 144	unknown	other
	Casp9	caspase 9, apoptosis-related cysteine peptidase	Cytoplasm	peptidase
	Casz1	castor zinc finger 1	Nucleus	enzyme
	B3galt6	UDP-Gal:betaGal beta 1,3-galactosyltransferase polypeptide 6	Cytoplasm	enzyme
	Pex1	peroxisomal biogenesis factor 1	Cytoplasm	enzyme
	Pnrc1	proline-rich nuclear receptor coactivator 1	Nucleus	other
	Kif24	kinesin family member 24	Cytoplasm	other
	AI464131	KIAA1161	Nucleus	other
	Frmpd1	FERM and PDZ domain containing 1	unknown	other
	5730528L13Rik	chromosome 9 open reading frame 30	unknown	other
	Pkdcc	protein kinase domain containing, cytoplasmic homolog (mouse)	Cytoplasm	kinase
	Frem1	FRAS1 related extracellular matrix 1	Extracellular Space	other
	Pla2g2c	phospholipase A2, group IIC	Extracellular Space	enzyme
	Zfp326	zinc finger protein 326	Nucleus	transcription regulator
	Mvk	mevalonate kinase	Cytoplasm	kinase
	Plcl2	phospholipase C-like 2	Cytoplasm	enzyme
	Pld1	phospholipase D1, phosphatidylcholine-specific	Cytoplasm	enzyme
	Plxna2	plexin A2	Plasma Membrane	transmembrane receptor
	Plxna2	plexin A2	Plasma Membrane	transmembrane receptor
	Dtx1	deltex homolog 1 (Drosophila)	Nucleus	transcription regulator
	Mapkapk5	mitogen-activated protein kinase-activated protein kinase 5	Cytoplasm	kinase
	Rad9b	RAD9 homolog B (S. pombe)	Nucleus	other
	P2rx7	purinergic receptor P2X, ligand-gated ion channel, 7	Plasma Membrane	ion channel
	Dhx37	DEAH (Asp-Glu-Ala-His) box polypeptide 37	unknown	enzyme
	Micall2	MICAL-like 2	Cytoplasm	other
	Micall2	MICAL-like 2	Cytoplasm	other
	Pop7	processing of precursor 7, ribonuclease P/MRP subunit (S. cerevisiae)	Nucleus	enzyme
	Ftsj2	FtsJ homolog 2 (E. coli)	Nucleus	enzyme
	Pramel5	PRAME family member 13	unknown	other
	Sema3e	sema domain, immunoglobulin domain (Ig), short basic domain, secreted, (semaphorin) 3E	Extracellular Space	other
	Prg2	proteoglycan 2, bone marrow (natural killer cell activator, eosinophil granule major basic protein)	Extracellular Space	other
	Prkg2	protein kinase, cGMP-dependent, type II	Cytoplasm	kinase
	Pclo	piccolo (presynaptic cytomatrix protein)	Cytoplasm	transporter
	Brca2	breast cancer 2, early onset	Nucleus	transcription regulator
	Prrc2b	proline-rich coiled-coil 2B	unknown	other
	Prss36	protease, serine, 36	Extracellular Space	peptidase
	Pion	pigeon homolog (Drosophila)	Cytoplasm	peptidase
	Psg25	pregnancy specific glycoprotein 18	Extracellular Space	other
	Ptchd2	patched domain containing 2	unknown	other
	Rint1	RAD50 interactor 1	Nucleus	other
	Plb1	phospholipase B1	Cytoplasm	enzyme
	Pten	phosphatase and tensin homolog	Cytoplasm	phosphatase
	Acox3	acyl-CoA oxidase 3, pristanoyl	Cytoplasm	enzyme
	Grpel1	GrpE-like 1, mitochondrial (E. coli)	Cytoplasm	other
	Pyhin1	pyrin and HIN domain family, member 1	unknown	other
	Pyhin1	pyrin and HIN domain family, member 1	unknown	other
	Ncapg	non-SMC condensin I complex, subunit G	Nucleus	other
	Sel1l3	sel-1 suppressor of lin-12-like 3 (C. elegans)	unknown	other
	Pds5a	PDS5, regulator of cohesion maintenance, homolog A (S. cerevisiae)	Nucleus	other
	Raet1c;Raet1e
	Rapgefl1	Rap guanine nucleotide exchange factor (GEF)-like 1	unknown	other
	Rassf7	Ras association (RalGDS/AF-6) domain family (N-terminal) member 7	unknown	other
	Pdgfra	platelet-derived growth factor receptor, alpha polypeptide	Plasma Membrane	kinase
	Rec8	REC8 homolog (yeast)	Nucleus	other
	Reg1	regenerating islet-derived 1 alpha	Extracellular Space	growth factor
	Reg3b	regenerating islet-derived 3 gamma	Extracellular Space	growth factor
	Resp18	regulated endocrine-specific protein 18 homolog (rat)	Extracellular Space	other
	Srd5a3	steroid 5 alpha-reductase 3	Cytoplasm	enzyme
	Rfc3	replication factor C (activator 1) 3, 38kDa	Nucleus	enzyme
	Polr2b	polymerase (RNA) II (DNA directed) polypeptide B, 140kDa	Nucleus	enzyme
	Rfx8	regulatory factor X, 8	unknown	other
	Rgnef	190 kDa guanine nucleotide exchange factor	unknown	other
	Polr2b	polymerase (RNA) II (DNA directed) polypeptide B, 140kDa	Nucleus	enzyme
	Rgs7	regulator of G-protein signaling 7	Cytoplasm	enzyme
	Ric3	resistance to inhibitors of cholinesterase 3 homolog (C. elegans)	Cytoplasm	other
	Fras1	Fraser syndrome 1	Extracellular Space	other
	Pdzrn3	PDZ domain containing ring finger 3	Extracellular Space	enzyme
	Rnasel	ribonuclease L (2',5'-oligoisoadenylate synthetase-dependent)	Cytoplasm	enzyme
	Cacna1c	calcium channel, voltage-dependent, L type, alpha 1C subunit	Plasma Membrane	ion channel
	Fbxl14	F-box and leucine-rich repeat protein 14	unknown	other
	Rp1l1	retinitis pigmentosa 1-like 1	unknown	other
	Rp1l1	retinitis pigmentosa 1-like 1	unknown	other
	Rpgrip1l	RPGRIP1-like	Cytoplasm	other
	C1rb	complement component 1, r subcomponent	Extracellular Space	peptidase
	Tead4	TEA domain family member 4	Nucleus	transcription regulator
	Far2	fatty acyl CoA reductase 2	Cytoplasm	enzyme
	Rptn	repetin	Cytoplasm	other
	Clcn1	chloride channel 1, skeletal muscle	Plasma Membrane	ion channel
	Clcn1	chloride channel 1, skeletal muscle	Plasma Membrane	ion channel
	Osbpl3	oxysterol binding protein-like 3	Cytoplasm	other
	Hoxa6	homeobox A6	Nucleus	transcription regulator
	Ccdc142	coiled-coil domain containing 142	unknown	other
	Aak1	AP2 associated kinase 1	Cytoplasm	kinase
	Runx1t1	runt-related transcription factor 1; translocated to, 1 (cyclin D-related)	Nucleus	transcription regulator
	Rwdd2b	RWD domain containing 2B	unknown	other
	Ryr3	ryanodine receptor 3	Plasma Membrane	ion channel
	Sbno1	strawberry notch homolog 1 (Drosophila)	unknown	enzyme
	Sbsn	suprabasin	Cytoplasm	other
	Scap	SREBF chaperone	Cytoplasm	other
	Scarf1	scavenger receptor class F, member 1	Plasma Membrane	transmembrane receptor
	Scd1	stearoyl-CoA desaturase (delta-9-desaturase)	Cytoplasm	enzyme
	Scin	scinderin	Cytoplasm	other
	Scn7a	sodium channel, voltage-gated, type VII, alpha	Plasma Membrane	ion channel
	Xpc	xeroderma pigmentosum, complementation group C	Nucleus	other
	Gdpd4	glycerophosphodiester phosphodiesterase domain containing 4	unknown	kinase
	2210018M11Rik	chromosome 11 open reading frame 30	Nucleus	other
	Selk	selenoprotein K	Cytoplasm	other
	Sema5b	sema domain, seven thrombospondin repeats (type 1 and type 1-like), transmembrane domain (TM) and short cytoplasmic domain, (semaphorin) 5B	Plasma Membrane	other
	Numa1	nuclear mitotic apparatus protein 1	Nucleus	other
	Trpc2	transient receptor potential cation channel, subfamily C, member 2, pseudogene	Plasma Membrane	ion channel
	Trim30a	tripartite motif-containing 30A	Nucleus	other
	Dub1a	ubiquitin specific peptidase 17-like 2	unknown	peptidase
	Setbp1	SET binding protein 1	Nucleus	other
	Arfip2	ADP-ribosylation factor interacting protein 2	Cytoplasm	other
	Dennd5a	DENN/MADD domain containing 5A	Cytoplasm	other
	Siglech	sialic acid binding Ig-like lectin H	unknown	other
	Ctr9	Ctr9, Paf1/RNA polymerase II complex component, homolog (S. cerevisiae)	Nucleus	other
	Slamf1	signaling lymphocytic activation molecule family member 1	Plasma Membrane	transmembrane receptor
	Slc10a2	solute carrier family 10 (sodium/bile acid cotransporter family), member 2	Plasma Membrane	transporter
	Slc12a1	solute carrier family 12 (sodium/potassium/chloride transporters), member 1	Plasma Membrane	transporter
	Slc14a2	solute carrier family 14 (urea transporter), member 2	Plasma Membrane	transporter
	Slc15a1	solute carrier family 15 (oligopeptide transporter), member 1	Plasma Membrane	transporter
	Slc15a1	solute carrier family 15 (oligopeptide transporter), member 1	Plasma Membrane	transporter
	Spon1	spondin 1, extracellular matrix protein	Extracellular Space	other
	Slc1a5	solute carrier family 1 (neutral amino acid transporter), member 5	Plasma Membrane	transporter
	Sox6	SRY (sex determining region Y)-box 6	Nucleus	transcription regulator
	Slc22a2	solute carrier family 22 (organic cation transporter), member 2	Plasma Membrane	transporter
	Slc22a6	solute carrier family 22 (organic anion transporter), member 6	Plasma Membrane	transporter
	Slc28a1	solute carrier family 28 (sodium-coupled nucleoside transporter), member 1	Plasma Membrane	transporter
	Slc35a4	solute carrier family 35, member A4	unknown	transporter
	Slc48a1	solute carrier family 48 (heme transporter), member 1	unknown	other
	Smg1	SMG1 homolog, phosphatidylinositol 3-kinase-related kinase (C. elegans)	Cytoplasm	kinase
	Slc6a19	solute carrier family 6 (neutral amino acid transporter), member 19	Plasma Membrane	transporter
	Slc6a5	solute carrier family 6 (neurotransmitter transporter, glycine), member 5	Plasma Membrane	transporter
	Apob48r
	Tmem219	transmembrane protein 219	Cytoplasm	other
	Zfp553	zinc finger protein 48	unknown	other
	Pla2g4c	phospholipase A2, group IVC (cytosolic, calcium-independent)	Cytoplasm	enzyme
	Dock1	dedicator of cytokinesis 1	Cytoplasm	other
	Smg1	SMG1 homolog, phosphatidylinositol 3-kinase-related kinase (C. elegans)	Cytoplasm	kinase
	Sorcs1	sortilin-related VPS10 domain containing receptor 1	Plasma Membrane	transporter
	Sox17	SRY (sex determining region Y)-box 17	Nucleus	transcription regulator
	Ctsd	cathepsin D	Cytoplasm	peptidase
	Ehd2	EH-domain containing 2	Nucleus	other
	Spen	spen homolog, transcriptional regulator (Drosophila)	Nucleus	transcription regulator
	Spen	spen homolog, transcriptional regulator (Drosophila)	Nucleus	transcription regulator
	Sphkap	SPHK1 interactor, AKAP domain containing	unknown	other
	Spinkl	serine protease inhibitor, Kazal type-like	unknown	other
	Kptn	kaptin (actin binding protein)	Cytoplasm	other
	Psg17	pregnancy specific glycoprotein 18	Extracellular Space	other
	Zfp180	zinc finger protein 180	Nucleus	transcription regulator
	Srpk1	SRSF protein kinase 1	Nucleus	kinase
	Ssrp1	structure specific recognition protein 1	Nucleus	other
	6030429G01Rik	chromosome 19 open reading frame 51	unknown	other
	Stam	signal transducing adaptor molecule (SH3 domain and ITAM motif) 1	Cytoplasm	other
	Il11	interleukin 11	Extracellular Space	cytokine
	Mybpc2	myosin binding protein C, fast type	Cytoplasm	other
	Stk31	serine/threonine kinase 31	Cytoplasm	kinase
	Ston2	stonin 2	Cytoplasm	other
	Strn3	striatin, calmodulin binding protein 3	Nucleus	transcription regulator
	Nr1h2	nuclear receptor subfamily 1, group H, member 2	Nucleus	ligand-dependent nuclear receptor
	Sycp2	synaptonemal complex protein 2	Nucleus	other
	Synpo2l	synaptopodin 2-like	Cytoplasm	other
	Taar9	trace amine associated receptor 9 (gene/pseudogene)	Plasma Membrane	G-protein coupled receptor
	Rps11	ribosomal protein S11	Cytoplasm	other
	Rps11	ribosomal protein S11	Cytoplasm	other
	Tas1r2	taste receptor, type 1, member 2	Plasma Membrane	G-protein coupled receptor
	Tas2r116	taste receptor, type 2, member 116	unknown	other
	Tulp2	tubby like protein 2	unknown	enzyme
	Herc2	hect domain and RLD 2	Cytoplasm	enzyme
	Tchh	trichohyalin	unknown	other
	Tdpoz1	TD and POZ domain containing pseudogene	unknown	other
	Tdrd6	tudor domain containing 6	Cytoplasm	other
	Herc2	hect domain and RLD 2	Cytoplasm	enzyme
	Teddm1	transmembrane epididymal protein 1	unknown	other
	Tex15	testis expressed 15	unknown	other
	Tex15	testis expressed 15	unknown	other
	Herc2	hect domain and RLD 2	Cytoplasm	enzyme
	Lins	lines homolog (Drosophila)	unknown	other
	Thsd7b	thrombospondin, type I, domain containing 7B	unknown	other
	Lrrc28	leucine rich repeat containing 28	unknown	other
	Tie1	tyrosine kinase with immunoglobulin-like and EGF-like domains 1	Plasma Membrane	kinase
	Ngrn	neugrin, neurite outgrowth associated	Nucleus	other
	Tlr11	toll-like receptor 11	unknown	other
	Eftud1	elongation factor Tu GTP binding domain containing 1	Cytoplasm	translation regulator
	Tmem132a	transmembrane protein 132A	Cytoplasm	other
	Tmem132c	transmembrane protein 132C	unknown	other
	Tmc3	transmembrane channel-like 3	unknown	other
	Ces2e	carboxylesterase 2E	unknown	enzyme
	4933405L10Rik	chromosome 16 open reading frame 86	unknown	other
	Tmprss4	transmembrane protease, serine 4	Plasma Membrane	peptidase
	Tnr	tenascin R (restrictin, janusin)	Plasma Membrane	other
	Tnrc6b	trinucleotide repeat containing 6B	unknown	other
	Tox	thymocyte selection-associated high mobility group box	Nucleus	other
	Tpo	thyroid peroxidase	Plasma Membrane	enzyme
	Tril	TLR4 interactor with leucine-rich repeats	unknown	other
	Zfhx3	zinc finger homeobox 3	Nucleus	transcription regulator
	Trim42	tripartite motif containing 42	unknown	other
	Trim72	tripartite motif containing 72	Cytoplasm	other
	Triml1	tripartite motif family-like 1	unknown	other
	Ddx19b	DEAD (Asp-Glu-Ala-As) box polypeptide 19B	Nucleus	enzyme
	Trip4	thyroid hormone receptor interactor 4	Nucleus	transcription regulator
	Foxc2	forkhead box C2 (MFH-1, mesenchyme forkhead 1)	Nucleus	transcription regulator
	Trp63	tumor protein p63	Nucleus	transcription regulator
	Afg3l1	AFG3 ATPase family gene 3-like 1 (S. cerevisiae), pseudogene	Cytoplasm	peptidase
	Trrap	transformation/transcription domain-associated protein	Nucleus	transcription regulator
	Csmd1	CUB and Sushi multiple domains 1	Plasma Membrane	other
	Ttbk1	tau tubulin kinase 1	unknown	kinase
	Csmd1	CUB and Sushi multiple domains 1	Plasma Membrane	other
	Thsd1	thrombospondin, type I, domain containing 1	Extracellular Space	other
	Brf2	BRF2, subunit of RNA polymerase III transcription initiation factor, BRF1-like	Nucleus	transcription regulator
	Ttll12	tubulin tyrosine ligase-like family, member 12	unknown	other
	Arhgef18	Rho/Rac guanine nucleotide exchange factor (GEF) 18	Cytoplasm	other
	Mfhas1	malignant fibrous histiocytoma amplified sequence 1	Cytoplasm	other
	Timm44	translocase of inner mitochondrial membrane 44 homolog (yeast)	Cytoplasm	transporter
	Klhl26	kelch-like 26 (Drosophila)	unknown	other
	Mtap1s	microtubule-associated protein 1S	Cytoplasm	enzyme
	Unc13a	unc-13 homolog A (C. elegans)	Plasma Membrane	other
	Txndc3	thioredoxin domain containing 3 (spermatozoa)	Cytoplasm	kinase
	Jak3	Janus kinase 3	Cytoplasm	kinase
	Ubqln4	ubiquilin 4	Cytoplasm	other
	Ubqlnl	ubiquilin-like	unknown	other
	Uggt1	UDP-glucose glycoprotein glucosyltransferase 1	Cytoplasm	enzyme
	B3gnt3	UDP-GlcNAc:betaGal beta-1,3-N-acetylglucosaminyltransferase 3	Cytoplasm	enzyme
	Rpgrip1l	RPGRIP1-like	Cytoplasm	other
	Rpgrip1l	RPGRIP1-like	Cytoplasm	other
	Slco2a1	solute carrier organic anion transporter family, member 2A1	Plasma Membrane	transporter
	Unc79	KIAA1409	unknown	other
	Ush1c	Usher syndrome 1C (autosomal recessive, severe)	Cytoplasm	other
	Usp43	ubiquitin specific peptidase 43	unknown	peptidase
	Usp51	ubiquitin specific protease 51	unknown	other
	Usp51	ubiquitin specific protease 51	unknown	other
	Vmn1r12	vomeronasal 1 receptor 12	Plasma Membrane	G-protein coupled receptor
	Vmn1r179	vomeronasal 1 receptor 179	unknown	other
	Vmn1r188	vomeronasal 1 receptor 210	Plasma Membrane	G-protein coupled receptor
	Vmn1r212	vomeronasal 1 receptor 210	Plasma Membrane	G-protein coupled receptor
	Vmn1r229	vomeronasal 1 receptor 229	Plasma Membrane	G-protein coupled receptor
	Vmn1r29	vomeronasal 1 receptor 29	Plasma Membrane	G-protein coupled receptor
	Vmn1r4	vomeronasal 1 receptor 4	Plasma Membrane	G-protein coupled receptor
	Vmn1r46	vomeronasal 1, receptor 49	Plasma Membrane	G-protein coupled receptor
	Vmn1r72	vomeronasal 1 receptor 72	unknown	other
	Vmn1r78	vomeronasal 1 receptor 78	Plasma Membrane	G-protein coupled receptor
	Vmn2r101	vomeronasal 2, receptor 104	unknown	other
	Vmn2r108	vomeronasal 2, receptor 108	unknown	other
	Vmn2r112	vomeronasal 2, receptor 115	unknown	other
	Vmn2r115	vomeronasal 2, receptor 115	unknown	other
	Vmn2r12
	Vmn2r121	vomeronasal 2, receptor 89	unknown	other
	Vmn2r123	vomeronasal 2, receptor 123	Plasma Membrane	other
	Vmn2r16	vomeronasal type-2 receptor 26-like	unknown	other
	Vmn2r19	vomeronasal 2, receptor 22	unknown	other
	Vmn2r19	vomeronasal 2, receptor 22	unknown	other
	Vmn2r19	vomeronasal 2, receptor 22	unknown	other
	Vmn2r22	vomeronasal 2, receptor 22	unknown	other
	Vmn2r22	vomeronasal 2, receptor 22	unknown	other
	Vmn2r23	vomeronasal 2, receptor 23	unknown	other
	Vmn2r61	vomeronasal 2, receptor 61	Plasma Membrane	G-protein coupled receptor
	Vmn2r63	vomeronasal 2, receptor 63	unknown	other
	Vmn2r79	vomeronasal 2, receptor 79	unknown	other
	Vmn2r8	vomeronasal 2, receptor 14	unknown	other
	Vmn2r90	vomeronasal 2, receptor 90	unknown	other
	Vmn2r93	vomeronasal 2, receptor 93	unknown	other
	Vmn2r96	vomeronasal 2, receptor 104	unknown	other
	Vmn2r99	vomeronasal 2, receptor 104	unknown	other
	Vmo1	vitelline membrane outer layer 1 homolog (chicken)	Extracellular Space	other
	Nckipsd	NCK interacting protein with SH3 domain	Nucleus	other
	Wbp2	WW domain binding protein 2	Cytoplasm	other
	Wbscr28	Williams-Beuren syndrome chromosome region 28	unknown	other
	Nbeal2	neurobeachin-like 2	unknown	other
	Zglp1	zinc finger, GATA-like protein 1	Nucleus	transcription regulator
	Pde4a	phosphodiesterase 4A, cAMP-specific	Cytoplasm	enzyme
	Wdr64	WD repeat domain 64	unknown	other
	Nfrkb	nuclear factor related to kappaB binding protein	Nucleus	transcription regulator
	Wnt5a	wingless-type MMTV integration site family, member 5A	Extracellular Space	cytokine
	Atm	ataxia telangiectasia mutated	Nucleus	kinase
	Wwc1	WW and C2 domain containing 1	Cytoplasm	transcription regulator
	Cspg4	chondroitin sulfate proteoglycan 4	Plasma Membrane	other
	Commd4	COMM domain containing 4	Cytoplasm	other
	Xirp1	xin actin-binding repeat containing 1	Plasma Membrane	other
	Xirp2	xin actin-binding repeat containing 2	unknown	other
	Pml	promyelocytic leukemia	Nucleus	transcription regulator
	Ylpm1	YLP motif containing 1	Nucleus	other
	Dennd4a	DENN/MADD domain containing 4A	Nucleus	other
	Vps13c	vacuolar protein sorting 13 homolog C (S. cerevisiae)	unknown	other
	Fam83b	family with sequence similarity 83, member B	unknown	other
	Zfhx2	zinc finger homeobox 2	Nucleus	other
	Zfml	zinc finger protein 638	Nucleus	other
	Med14	mediator complex subunit 14	Nucleus	transcription regulator
	Gprasp1	G protein-coupled receptor associated sorting protein 1	Cytoplasm	transporter
	Dock11	dedicator of cytokinesis 11	Cytoplasm	other
	Cd99l2	CD99 molecule-like 2	Plasma Membrane	other
	Zfp541	zinc finger protein 541	Nucleus	other
	Wdr13	WD repeat domain 13	Nucleus	other
	Zfp57	zinc finger protein 57 homolog (mouse)	Nucleus	transcription regulator
	Zfp775	zinc finger protein 775	unknown	other
	Wdr13	WD repeat domain 13	Nucleus	other
	Dmd	dystrophin	Plasma Membrane	other
	Dmd	dystrophin	Plasma Membrane	other
	Zfx	zinc finger protein, X-linked	Nucleus	transcription regulator
	Zkscan4	zinc finger with KRAB and SCAN domains 4	Nucleus	transcription regulator
	Zc3h12b	zinc finger CCCH-type containing 12B	unknown	other
	Znrf4	zinc and ring finger 4	Cytoplasm	other
	Zscan18	zinc finger and SCAN domain containing 18	unknown	other
	Zscan18	zinc finger and SCAN domain containing 18	unknown	other
